# Supplementary material for: Simple and facile synthesis of tetralone-spiro-glutarimides and spiro-bisglutarimides from Baylis–Hillman acetates
Source: Royal Society of Chemistry journal article supplement (doi:10.1039/b717843c), 2008-01-01
Supplement: b717843c.pdf [file b717843c.pdf]

## Electronic Supplementary Information

### Simple and Facile Synthesis of Tetralone-Spiro-Glutarimides and Spiro-Bisglutarimides from the Baylis-Hillman Acetates

*Deevi Basavaiah\* and Raju Jannapu Reddy*

School of Chemistry, University of Hyderabad

Hyderabad-500 046, India

| Contents                                                     | Page    |
|--------------------------------------------------------------|---------|
| (1) General & experimental procedures with all spectral data | 2-17    |
| (2) Crystal data & ORTEP diagram of compound <b>2e</b>       | 4 & 5   |
| (3) Crystal data & ORTEP diagram of compound <b>3a</b>       | 8       |
| (4) Crystal data & ORTEP diagram of compound <b>3f</b>       | 11 & 12 |
| (5) Crystal data & ORTEP diagram of compound <b>4d</b>       | 16 & 17 |

## EXPERIMENTAL SECTION

**General Methods:** Melting points were recorded on a Superfit (India) capillary melting point apparatus and are uncorrected. IR spectra were recorded on a JASCO-FT-IR model 5300 spectrometer using solid samples as KBr plates.  $^1\text{H}$  NMR (400 MHz) and  $^{13}\text{C}$  NMR (50 / 100 MHz) spectra were recorded in deuteriochloroform ( $\text{CDCl}_3$ ) or deuterodimethyl sulfoxide ( $\text{DMSO}-d_6$ ) or in deuteriochloroform ( $\text{CDCl}_3$ ) containing deuterodimethyl sulfoxide ( $\text{DMSO}-d_6$ ) on a Bruker-AVANCE-400 and Bruker-AC-200 spectrometer using tetramethylsilane ( $\text{TMS}$ ,  $\delta = 0$ ) as an internal standard. Elemental analyses were recorded on a Thermo-Finnigan Flash EA 1112 analyzer. Mass spectra were recorded on Shimadzu-LCMS-2010 A mass spectrometer. The X-ray diffraction measurements were carried out at 298 K on a Bruker SMART APEX CCD area detector system equipped with a graphite monochromator and a Mo- $\text{K}\alpha$  fine-focus sealed tube ( $\lambda = 0.71073 \text{ \AA}$ ).

**Di-*tert*-butyl 2,6-di[(*E*)-benzylidene]-4-cyano-4-phenyl-1,7-heptanedioate (2a):**

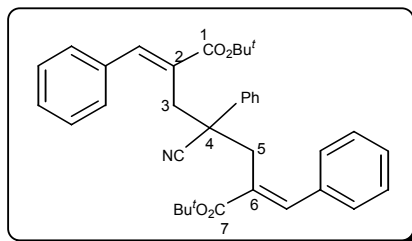

To a stirred suspension of oil free excess NaH (10 mmol, 0.24 g) in anhydrous toluene were added benzyl cyanide (2 mmol, 0.234 g) and *tert*-butyl 3-acetoxy-2-methylene-3-phenylpropanoate (**1a**) (5 mmol, 1.38 g) at room temperature and heated under reflux for 1 h in  $\text{N}_2$  atmosphere. Then the reaction mixture was allowed to come to room temperature and cooled to  $0^\circ\text{C}$ . Excess NaH was carefully quenched with very slow addition of water at  $0^\circ\text{C}$ . Reaction mixture was extracted with ether (3 X 30 mL). The combined organic layer was dried over anhydrous  $\text{Na}_2\text{SO}_4$  and solvent was evaporated. The residue, thus obtained, was purified by column chromatography (5% ethyl acetate in hexanes) followed by crystallization (from 3% ethyl acetate in hexanes at  $0^\circ\text{C}$ )<sup>#</sup> to afford the di-*tert*-butyl 2,6-di[(*E*)-benzylidene]-4-cyano-4-phenyl-1,7-heptanedioate (**2a**), as a colorless solid in 73% (0.80 g) yield; mp:  $118\text{--}120^\circ\text{C}$ ; IR (KBr):  $\nu$  2235,

1711, 1635  $\text{cm}^{-1}$ ;  $^1\text{H}$  NMR (400 MHz,  $\text{CDCl}_3$ ):  $\delta$  1.44 (s, 18H), 3.09 & 3.34 (ABq, 4H,  $J = 13.6$  Hz), 6.98-7.38 (m, 15H), 7.62 (s, 2H);  $^{13}\text{C}$  NMR (50 MHz,  $\text{CDCl}_3$ ):  $\delta$  28.00, 35.95, 48.28, 81.34, 120.39, 126.53, 127.50, 128.04, 128.16, 128.42, 128.84, 130.27, 135.60, 137.54, 142.01, 166.94; LCMS ( $m/z$ ): 548 (M-H) $^-$ ; Anal. Calcd. for  $\text{C}_{36}\text{H}_{39}\text{NO}_4$ : C, 78.66; H, 7.15; N, 2.55; Found: C, 78.67; H, 7.11; N, 2.64.

<sup>#</sup>The crude product contains 8% (*Z*)-isomer, as indicated by the  $^1\text{H}$  NMR spectral analysis. However crystallization provides pure (*E*)-isomer. In the case of **2c-i**, crude compounds show the presence of 5-14% (*Z*)-isomer. However, crystallization (3% ethyl acetate in hexanes for **2b-g** and 8% ethyl acetate in hexanes for **2h** & **2i**), provides the pure (*E*)-isomer. In the case of **2b**,  $^1\text{H}$  NMR of the crude product did not show the presence of any (*Z*)-isomer.

**Di-*tert*-butyl 2,6-di[(*E*)-2-methylbenzylidene]-4-cyano-4-phenyl-1,7-heptanedioate (2b):**

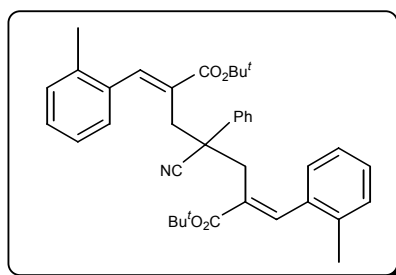

Yield: 81%; mp: 127-129  $^\circ\text{C}$ ; IR (KBr):  $\nu$  2237, 1718, 1628  $\text{cm}^{-1}$ ;  $^1\text{H}$  NMR (400 MHz,  $\text{CDCl}_3$ ):  $\delta$  1.50 (s, 18H), 1.92 (s, 6H), 2.98 & 3.14 (ABq, 4H,  $J = 13.6$  Hz), 6.82-6.92 (m, 6H), 6.98-7.22 (m, 7H), 7.62 (s, 2H);  $^{13}\text{C}$  NMR (50 MHz,  $\text{CDCl}_3$ ):  $\delta$  19.73, 27.97, 35.42, 47.84, 81.34, 120.10, 125.49, 126.09, 127.14, 127.99, 130.12, 130.29, 134.88, 137.11, 137.28, 141.67, 166.70; LCMS ( $m/z$ ): 578 (M+H) $^+$ ; Anal. Calcd. for  $\text{C}_{38}\text{H}_{43}\text{NO}_4$ : C, 79.00; H, 7.50; N, 2.42; Found: C, 79.05; H, 7.49; N, 2.41.

**Di-*tert*-butyl 2,6-di[(*E*)-4-methylbenzylidene]-4-cyano-4-phenyl-1,7-heptanedioate (2c):**

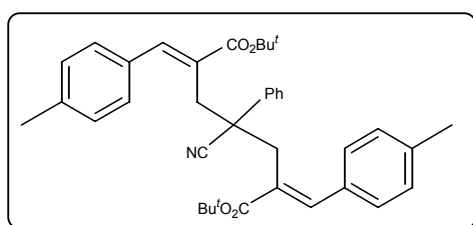

Yield: 80%; mp: 124-126 °C; IR (KBr):  $\nu$  2235, 1709, 1635  $\text{cm}^{-1}$ ;  $^1\text{H}$  NMR (400 MHz,  $\text{CDCl}_3$ ):  $\delta$  1.42 (s, 18H), 2.35 (s, 6H), 3.12 & 3.38 (ABq, 4H,  $J = 13.6$  Hz), 6.96-7.13 (m, 11H), 7.16-7.21 (m, 2H), 7.60 (s, 2H);  $^{13}\text{C}$  NMR (50 MHz,  $\text{CDCl}_3$ ):  $\delta$  21.33, 27.97, 36.03, 48.45, 81.12, 120.47, 126.60, 127.48, 128.11, 129.03, 129.10, 129.47, 132.64, 137.81, 138.08, 142.06, 167.14; LCMS ( $m/z$ ): 576 (M-H) $^-$ ; Anal. Calcd. for  $\text{C}_{38}\text{H}_{43}\text{NO}_4$ : C, 79.00; H, 7.50; N, 2.42; Found: C, 78.91; H, 7.51; N, 2.46.

**Di-*tert*-butyl 2,6-di[(*E*)-4-ethylbenzylidene]-4-cyano-4-phenyl-1,7-heptanedioate (2d):**

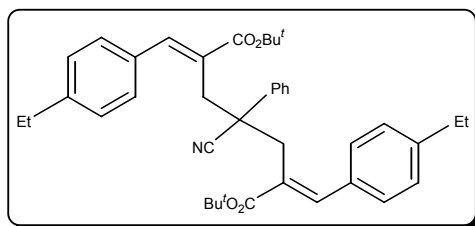

Yield: 78%; mp: 80-82 °C; IR(KBr):  $\nu$  2361, 1703, 1633  $\text{cm}^{-1}$ ;  $^1\text{H}$  NMR (400 MHz,  $\text{CDCl}_3$ ):  $\delta$  1.23 (t, 6H,  $J = 7.6$  Hz), 1.44 (s, 18H), 2.64 (q, 4H,  $J = 7.6$  Hz), 3.13 & 3.39 (ABq, 4H,  $J = 13.6$  Hz), 6.98-7.22 (m, 13H), 7.60 (s, 2H);  $^{13}\text{C}$  NMR (50 MHz,  $\text{CDCl}_3$ ):  $\delta$  15.43, 28.02, 28.68, 36.10, 48.45, 81.17, 120.49, 126.63, 127.45, 127.91, 128.08, 129.08, 129.49, 132.91, 137.79, 142.13, 144.38, 167.16; LCMS ( $m/z$ ): 604 (M-H) $^-$ ; Anal. Calcd. for  $\text{C}_{40}\text{H}_{47}\text{NO}_4$ : C, 79.30; H, 7.82; N, 2.31; Found: C, 79.20; H, 7.82; N, 2.38.

**Di-*tert*-butyl 2,6-di[(*E*)-4-isopropylbenzylidene]-4-cyano-4-phenyl-1,7-heptanedioate (2e):**

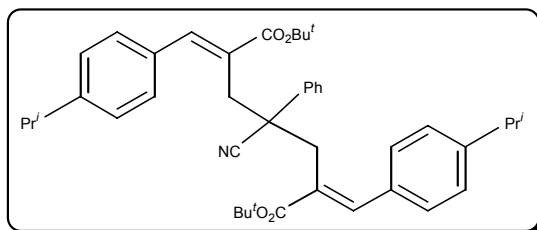

Yield: 72%; mp: 110-111 °C; IR (KBr):  $\nu$  2239, 1711, 1628  $\text{cm}^{-1}$ ;  $^1\text{H}$  NMR (400 MHz,  $\text{CDCl}_3$ ):  $\delta$  1.25 (d, 12H,  $J = 6.8$  Hz), 1.45 (s, 18H), 2.89 (sept, 2H,  $J = 6.8$  Hz), 3.14 & 3.39 (ABq, 4H,  $J = 13.6$  Hz), 6.97-7.07 (m, 7H), 7.08-7.19 (m, 6H), 7.60 (s, 2H);  $^{13}\text{C}$  NMR (50 MHz,  $\text{CDCl}_3$ ):  $\delta$  23.90, 28.02, 33.94, 36.12, 48.45, 81.17, 120.47, 126.46, 126.60, 127.40, 128.04, 129.05, 129.47, 133.03, 137.74, 142.13, 148.97, 167.16; LCMS ( $m/z$ ): 632 (M-H) $^-$ ; Anal. Calcd. for  $\text{C}_{42}\text{H}_{51}\text{NO}_4$ : C, 79.58; H, 8.11; N, 2.21; Found: C, 79.63; H, 8.13; N, 2.32; **Crystal data** for **2e**: empirical formula,  $\text{C}_{42}\text{H}_{51}\text{NO}_4$ ; formula weight, 633.84;

crystal color, habit: colorless, rectangular; crystal dimensions, 0.41 X 0.28 X 0.16 mm<sup>3</sup>; crystal system, monoclinic; lattice type, primitive; lattice parameters,  $a = 11.799(2)$  Å,  $b = 14.900(3)$  Å,  $c = 21.767(4)$  Å;  $\alpha = 90.00$ ;  $\beta = 98.298(3)$ ;  $\gamma = 90.00$ ;  $V = 3786.6(11)$  Å<sup>3</sup>; space group,  $P 21/n$  (International Table No. 14);  $Z = 4$ ;  $D_{\text{calcd}} = 1.112$  g / cm<sup>3</sup>;  $F_{000} = 1368$ ;  $\lambda(\text{Mo-K}\alpha) = 0.71073$  Å;  $R(I \geq 2\sigma_I) = 0.0580$ ;  $wR^2 = 0.1491$ . Detailed X-ray crystallographic data is available from the Cambridge Crystallographic Data Centre, 12 Union Road, Cambridge CB2 1EZ, UK (for compound **2e** CCDC # 656194).

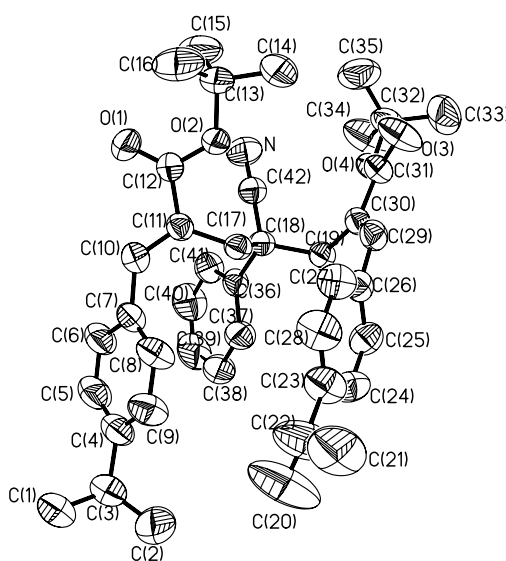

**Figure 1** ORTEP diagram (50% probability) of compound **2e** (Hydrogen atoms are omitted for clarity)

**Di-*tert*-butyl 2,6-di[(*E*)-2-chlorobenzylidene]-4-cyano-4-phenyl-1,7-heptanedioate (**2f**):**

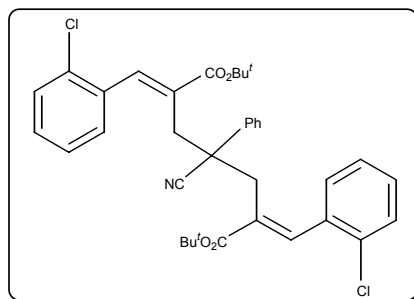

Yield: 70%; mp: 140-142 °C; IR (KBr):  $\nu$  2239, 1707, 1635 cm<sup>-1</sup>; <sup>1</sup>H NMR (400 MHz, CDCl<sub>3</sub>):  $\delta$  1.47 (s, 18H), 2.99 & 3.24 (ABq, 4H,  $J = 13.6$  Hz), 6.95-7.10 (m, 7H), 7.12-7.32 (m, 6H), 7.63 (s, 2H); <sup>13</sup>C NMR

(50 MHz, CDCl<sub>3</sub>):  $\delta$ 28.00, 35.95, 47.67, 81.66, 120.10, 126.29, 126.51, 127.50, 128.25, 129.25, 129.71, 131.67, 134.15, 134.32, 136.86, 139.22, 166.34; LCMS ( $m/z$ ): 640 (M+Na)<sup>+</sup>, 642 [(M+2)+Na]<sup>+</sup>, 644 [(M+4)+Na]<sup>+</sup>; Anal. Calcd. for C<sub>36</sub>H<sub>37</sub>Cl<sub>2</sub>NO<sub>4</sub>: C, 69.90; H, 6.03; N, 2.26; Found: C, 69.75; H, 6.07; N, 2.34.

**Di-tert-butyl 2,6-di[(E)-3-chlorobenzylidene]-4-cyano-4-phenyl-1,7-heptanedioate (2g):**

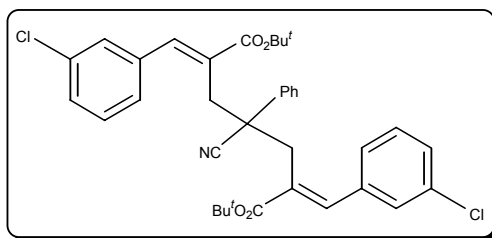

Yield: 65%; mp: 151-152 °C; IR (KBr):  $\nu$  2235, 1709, 1635 cm<sup>-1</sup>; <sup>1</sup>H NMR (400 MHz, CDCl<sub>3</sub>):  $\delta$  1.46 (s, 18H), 3.10 & 3.30 (ABq, 4H,  $J$  = 13.6 Hz), 6.92-7.25 (m, 13H), 7.54 (s, 2H); <sup>13</sup>C NMR (50MHz, CDCl<sub>3</sub>):  $\delta$  27.97, 36.10, 48.20, 81.68, 120.13, 126.48, 126.70, 127.70, 128.06, 128.11, 128.62, 129.64, 131.41, 134.34, 136.94, 137.35, 140.33, 166.43; LCMS ( $m/z$ ): 618 (M+H)<sup>+</sup>, 620 [(M+2)+H]<sup>+</sup>, 622 [(M+4)+H]<sup>+</sup>; Anal. Calcd. for C<sub>36</sub>H<sub>37</sub>Cl<sub>2</sub>NO<sub>4</sub>: C, 69.90; H, 6.03; N, 2.26; Found: C, 69.72; H, 6.03; N, 2.22.

**Di-tert-butyl 2,6-di[(E)-4-chlorobenzylidene]-4-cyano-4-phenyl-1,7-heptanedioate (2h):**

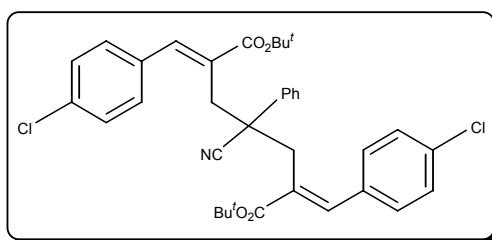

Yield: 66%; mp: 184-186 °C; IR (KBr):  $\nu$  2235, 1714, 1633 cm<sup>-1</sup>; <sup>1</sup>H NMR (400 MHz, CDCl<sub>3</sub>):  $\delta$  1.44 (s, 18H), 3.09 & 3.13 (ABq, 4H,  $J$  = 13.6 Hz), 6.99 (d, 4H,  $J$  = 8.4 Hz), 7.04-7.18 (m, 5H), 7.23 (d, 4H,  $J$  = 8.4 Hz), 7.56 (s, 2H); <sup>13</sup>C NMR (50 MHz, CDCl<sub>3</sub>):  $\delta$  28.00, 36.20, 48.40, 81.61, 120.22, 126.60, 127.74, 128.28, 128.67, 130.17, 130.87, 133.98, 137.33, 140.67, 166.65; LCMS ( $m/z$ ): 640 (M+Na)<sup>+</sup>, 642 [(M+2)+Na]<sup>+</sup>, 644 [(M+4)+Na]<sup>+</sup>; Anal. Calcd. for C<sub>36</sub>H<sub>37</sub>Cl<sub>2</sub>NO<sub>4</sub>: C, 69.90; H, 6.03; N, 2.26; Found: C, 69.96; H, 5.99; N, 2.16.

**Di-tert-butyl 2,6-di[(E)-4-bromobenzylidene]-4-cyano-4-phenyl-1,7-heptanedioate (2i):**

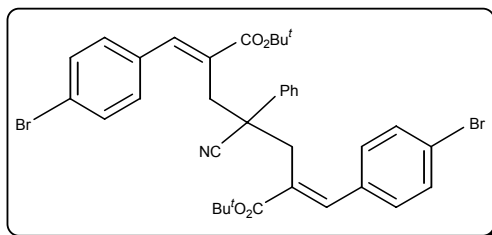

Yield: 63%; mp: 187-189 °C; IR (KBr):  $\nu$  2235, 1712, 1633  $\text{cm}^{-1}$ ;  $^1\text{H}$  NMR (400 MHz,  $\text{CDCl}_3$ ):  $\delta$  1.44 (s, 18H), 3.08 & 3.31 (ABq, 4H,  $J = 13.6$  Hz), 6.92 (d, 4H,  $J = 8.4$  Hz), 7.02-7.18 (m, 5H), 7.36 (d, 4H,  $J = 8.4$  Hz), 7.53 (s, 2H);  $^{13}\text{C}$  NMR (50 MHz,  $\text{CDCl}_3$ ):  $\delta$  27.97, 36.17, 48.33, 81.61, 120.18, 122.26, 126.58, 127.74, 128.28, 130.39, 130.92, 131.60, 134.41, 137.23, 140.67, 166.60; LCMS ( $m/z$ ): 727 ( $\text{M}+\text{Na}$ ) $^+$ , 729 [ $(\text{M}+2)+\text{Na}$ ] $^+$ , 731 [ $(\text{M}+4)+\text{Na}$ ] $^+$ ; Anal. Calcd. for  $\text{C}_{36}\text{H}_{37}\text{Br}_2\text{NO}_4$ : C, 61.12; H, 5.27; N, 1.98; Found; C, 61.29; H, 5.25; N, 1.98.

**2,5'-Di[(E)-benzylidene]-[1,2,3,4-tetrahydronaphthalen-1-one]-4-spiro-3'-[piperidine-2',6'-dione] (3a):**

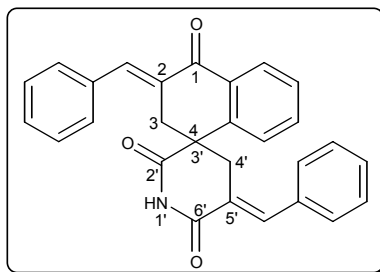

To a stirred solution of di-tert-butyl 2,6-di[(E)-benzylidene]-4-cyano-4-phenyl-1,7-heptanedioate (**2a**) (0.5 mmol, 0.275 g) in 1,2-dichloroethane (DCE, 3 mL) were added conc.  $\text{H}_2\text{SO}_4$  (2.5 mmol, 0.245 g, 0.13 mL) and trifluoroacetic anhydride (TFAA, 2.5 mmol, 0.525 g, 0.35 mL) at room temperature. The reaction mixture was heated under reflux for 6 h and then allowed to cool to room temperature. Reaction mixture was poured into aqueous  $\text{K}_2\text{CO}_3$  solution and extracted with EtOAc (3 X 25 mL). The combined organic layer was dried over anhydrous  $\text{Na}_2\text{SO}_4$ . Solvent was evaporated and the residue, thus obtained was purified by column chromatography (30% ethyl acetate in hexanes) to provide, 2,5'-di[(E)-benzylidene]-[1,2,3,4-tetrahydronaphthalen-1-one]-4-spiro-3'-[piperidine-2',6'-dione] (**3a**), as a colorless

solid in 80% (0.168 g) yield; mp: 184-186 °C; IR (KBr):  $\nu$  3300-2800 (multiple bands), 1711, 1693, 1651, 1624  $\text{cm}^{-1}$ ;  $^1\text{H}$  NMR (400 MHz,  $\text{CDCl}_3$ ):  $\delta$  3.08 (s, 2H), 3.38 & 3.48 (ABq, 2H,  $J = 14.8$  Hz), 6.88 (d, 2H,  $J = 6.6$  Hz), 7.13-7.41 (m, 9H), 7.43-7.51 (m, 1H), 7.53-7.62 (m, 1H), 7.72 (s, 1H), 7.85 (s, 1H), 8.20 (d, 1H,  $J = 7.2$  Hz), 8.68 (s, 1H,  $\text{D}_2\text{O}$  exchangeable);  $^{13}\text{C}$  NMR (100 MHz,  $\text{CDCl}_3$ ):  $\delta$  35.23, 36.15, 48.25, 124.07, 126.64, 128.64, 128.67, 129.10, 129.17, 129.42, 129.55, 129.74, 129.87, 132.58, 133.63, 133.90, 134.60, 140.29, 142.49, 166.30, 174.45, 185.72; LCMS ( $m/z$ ): 420 ( $\text{M}+\text{H}$ ) $^+$ ; Anal. Calcd. for  $\text{C}_{28}\text{H}_{21}\text{NO}_3$ : C, 80.17; H, 5.05; N, 3.34; Found: C, 80.27; H, 5.00; N, 3.35; **Crystal data** for **3a**: empirical formula,  $\text{C}_{28}\text{H}_{21}\text{NO}_3$ ; formula weight, 419.46; crystal color, habit: colorless, block; crystal dimensions, 0.44 X 0.28 X 0.22  $\text{mm}^3$ ; crystal system, monoclinic; lattice type, primitive; lattice parameters,  $a = 9.0369(18)$  Å,  $b = 25.751(5)$  Å,  $c = 9.2740(18)$  Å;  $\alpha = 90.00$ ;  $\beta = 96.108(3)$ ;  $\gamma = 90.00$ ;  $V = 2145.9(7)$  Å $^3$ ; space group,  $P21/n$  (International Table No. 14);  $Z = 4$ ;  $D_{\text{calcd}} = 1.298$  g /  $\text{cm}^3$ ;  $F_{000} = 880$ ;  $\lambda(\text{Mo-K}\alpha) = 0.71073$  Å;  $R(I \geq 2\sigma_1) = 0.0427$ ;  $wR^2 = 0.1031$ . Detailed X-ray crystallographic data is available from the Cambridge Crystallographic Data Centre, 12 Union Road, Cambridge CB2 1EZ, UK (for compound **3a** CCDC # 656195).

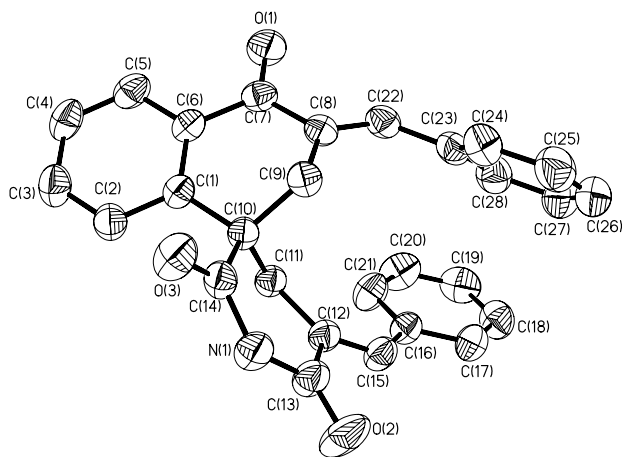

**Figure 2** ORTEP diagram (50% probability) of compound **3a**  
(Hydrogen atoms are omitted for clarity)



**2,5'-Di[(E)-2-methylbenzylidene]-[1,2,3,4-tetrahydronaphthalen-1-one]-4-spiro-3'-[piperidine-2',6'-dione] (3b):**

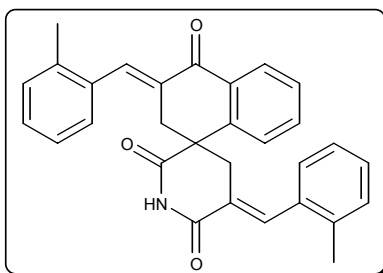

Yield: 75%; mp: 232-234 °C; IR (KBr):  $\nu$  3300-2800 (multiple bands), 1718, 1684, 1650, 1624  $\text{cm}^{-1}$ ;  $^1\text{H}$  NMR (400 MHz, 50 % DMSO- $d_6$  in  $\text{CDCl}_3$ ):  $\delta$  1.92 (s, 3H), 2.05 (s, 3H), 2.87 & 3.36 (ABq, 2H,  $J = 15.0$  Hz)\*, 3.00-3.12 (m, 2H), 6.73 (d, 1H,  $J = 7.5$  Hz), 7.00-7.36 (m, 8H), 7.44-7.52 (m, 1H), 7.55-7.65 (m, 1H) 7.71 (s, 1H), 7.81 (s, 1H), 8.10 (d, 1H,  $J = 7.6$  Hz), 11.21 (br s, 1H);  $^{13}\text{C}$  NMR (100 MHz, 50% DMSO- $d_6$  in  $\text{CDCl}_3$ ):  $\delta$  18.16, 18.34, 33.90, 33.98, 46.01, 124.21, 124.30, 125.17, 126.75, 126.88, 126.99, 127.06, 127.61, 127.69, 128.83, 128.96, 129.31, 131.24, 131.57, 132.24, 135.96, 136.31, 136.39, 137.92, 141.62, 165.04, 173.07, 184.00; LCMS ( $m/z$ ): 448 (M+H) $^+$ ; Anal. Calcd. for  $\text{C}_{30}\text{H}_{25}\text{NO}_3$ : C, 80.51; H, 5.63; N, 3.13; Found: C, 80.55; H, 5.61; N, 3.16; \*[One of the doublets (second part) of the AB quartet arising from one of the methylenes (two protons) partly merges with moisture peak in DMSO- $d_6$  at  $\delta$  3.27. When we recorded in the presence of  $\text{Eu}(\text{fod})_3$  as a shift reagent, a multiplet at  $\delta$  2.84-3.15 for two methylenes (four protons) was observed].

**2,5'-Di[(E)-4-methylbenzylidene]-[1,2,3,4-tetrahydronaphthalen-1-one]-4-spiro-3'-[piperidine-2',6'-dione] (3c):**

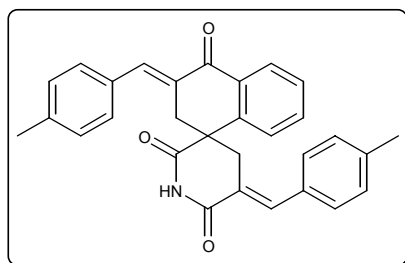

Yield: 77%; mp: 227-229 °C; IR (KBr):  $\nu$  3200-2950 (multiple bands), 1718, 1674, 1655, 1618  $\text{cm}^{-1}$ ;  $^1\text{H}$  NMR (400 MHz,  $\text{CDCl}_3$ ):  $\delta$  2.34 (s, 3H), 2.39 (s, 3H), 3.08 (s, 2H), 3.39 & 3.48 (ABq, 2H,  $J = 14.9$  Hz),

6.81 (d, 2H,  $J = 7.6$  Hz), 7.04-7.34 (m, 7H), 7.44-7.51 (m, 1H), 7.53-7.61 (m, 1H), 7.70 (s, 1H), 7.85 (s, 1H), 8.20 (d, 1H,  $J = 7.6$  Hz), 8.41 (s, 1H, D<sub>2</sub>O exchangeable); <sup>13</sup>C NMR (100 MHz, CDCl<sub>3</sub>):  $\delta$  21.47, 21.53, 35.34, 36.23, 48.25, 123.16, 126.59, 128.61, 129.08, 129.38, 129.41, 129.58, 130.00, 130.88, 131.83, 132.67, 133.82, 139.52, 139.98, 140.50, 142.51, 142.66, 166.56, 174.61, 185.89; LCMS ( $m/z$ ): 448 (M+H)<sup>+</sup>; Anal. Calcd. for C<sub>30</sub>H<sub>25</sub>NO<sub>3</sub>: C, 80.51; H, 5.63; N, 3.13; Found: C, 80.66; H, 5.62; N, 3.16.

**2,5'-Di(*E*)-4-ethylbenzylidene]-[1,2,3,4-tetrahydronaphthalen-1-one]-4-spiro-3'-[piperidine-2',6'-dione] (3d):**

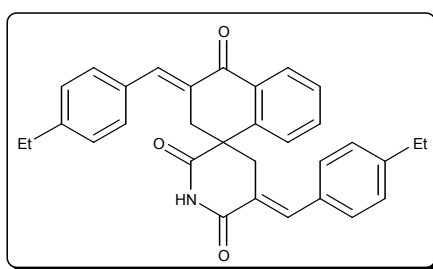

Yield: 78%; mp: 150-152 °C; IR (KBr):  $\nu$  3200-2800 (multiple bands), 1714, 1684, 1650, 1630 cm<sup>-1</sup>; <sup>1</sup>H NMR (400 MHz, CDCl<sub>3</sub>):  $\delta$  1.10-1.38 (m, 6H), 2.55-2.81 (m, 4H), 3.10 (s, 2H), 3.41 & 3.49 (ABq, 2H,  $J = 14.6$  Hz), 6.83 (d, 2H,  $J = 7.6$  Hz), 7.05-7.34 (m, 7H), 7.42-7.51 (m, 1H), 7.52-7.61 (m, 1H), 7.71 (s, 1H), 7.85 (s, 1H), 8.21 (d, 1H,  $J = 7.6$  Hz), 8.66 (br s, 1H, D<sub>2</sub>O exchangeable); <sup>13</sup>C NMR (100 MHz, CDCl<sub>3</sub>):  $\delta$  15.30, 15.38, 28.77, 28.83, 35.29, 36.19, 48.29, 123.07, 126.59, 128.18, 128.22, 128.61, 129.01, 129.05, 129.68, 130.08, 131.07, 132.03, 132.65, 133.82, 140.49, 142.50, 142.65, 145.75, 146.23, 166.53, 174.59, 185.93; LCMS ( $m/z$ ): 476 (M+H)<sup>+</sup>; Anal. Calcd. for C<sub>32</sub>H<sub>29</sub>NO<sub>3</sub>: C, 80.82, H, 6.15, N, 2.95; Found: C, 80.84; H, 6.19; N, 2.91.

**2,5'-Di(*E*)-4-isopropylbenzylidene]-[1,2,3,4-tetrahydronaphthalen-1-one]-4-spiro-3'-[piperidine-2',6'-dione] (3e):**

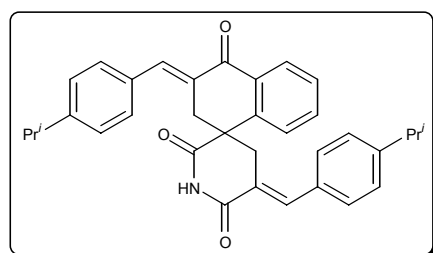

Yield: 75%; mp: 179-180 °C; IR (KBr):  $\nu$  3250-2900 (multiple bands), 1718, 1693, 1652, 1628  $\text{cm}^{-1}$ ;  $^1\text{H}$  NMR (400 MHz,  $\text{CDCl}_3$ ):  $\delta$  1.22-1.32 (m, 12H), 2.82-3.00 (m, 2H), 3.12 (s, 2H), 3.33-3.59 (m, 2H), 6.84 (d, 2H,  $J = 6.5$  Hz), 7.03-7.34 (m, 7H), 7.41-7.51 (m, 1H), 7.52-7.62 (m, 1H), 7.70 (s, 1H), 7.84 (s, 1H), 8.21 (d, 1H,  $J = 6.7$  Hz), 8.53 (s, 1H);  $^{13}\text{C}$  NMR (100 MHz,  $\text{CDCl}_3$ ):  $\delta$  23.81, 34.05, 34.09, 35.26, 36.15, 48.32, 123.01, 126.62, 126.75, 126.81, 128.61, 128.99, 129.03, 129.75, 130.11, 131.19, 132.15, 133.82, 140.45, 142.54, 142.59, 150.29, 150.80, 166.62, 174.64, 185.98; LCMS ( $m/z$ ): 504 ( $\text{M}+\text{H}$ ) $^+$ ; Anal. Calcd. for  $\text{C}_{34}\text{H}_{33}\text{NO}_3$ : C, 81.08; H, 6.60; N, 2.78; Found: C, 81.18; H, 6.61; N, 2.81.

**2,5'-Di(*E*)-2-chlorobenzylidene]-[1,2,3,4-tetrahydronaphthalen-1-one]-4-spiro-3'-[piperidine-2',6'-dione] (3f):**

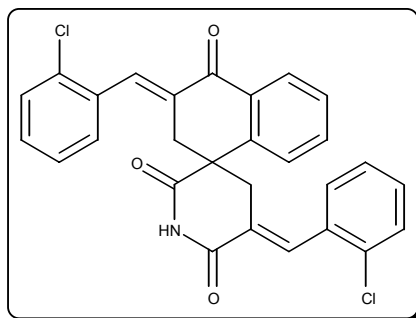

Yield: 82%; mp: 187-189 °C; IR (KBr):  $\nu$  3200-3050 (multiple bands), 1720, 1680, 1612  $\text{cm}^{-1}$ ;  $^1\text{H}$  NMR (400 MHz,  $\text{CDCl}_3$ ):  $\delta$  2.83 & 3.53 (ABq, 2H,  $J = 14.4$  Hz), 3.05 & 3.09 (2s, 2H), 6.64 (d, 1H,  $J = 5.8$  Hz), 7.08-7.64 (m, 10H), 7.89 (s, 1H), 7.97 (s, 1H), 8.21 (d, 1H,  $J = 6.3$  Hz), 8.39 (s, 1H);  $^{13}\text{C}$  NMR (100 MHz,  $\text{CDCl}_3$ ):  $\delta$  35.70, 36.12, 47.92, 125.79, 126.12, 126.75, 128.83, 129.31, 129.52, 129.93, 129.98, 130.12, 130.28, 130.67, 131.79, 132.09, 132.23, 133.34, 134.05, 134.59, 134.85, 137.15, 139.69, 142.22, 165.83, 173.97, 185.35; LCMS ( $m/z$ ): 488 ( $\text{M}+\text{H}$ ) $^+$ , 490 [( $\text{M}+2$ )+ $\text{H}$ ] $^+$ , 492 [( $\text{M}+4$ )+ $\text{H}$ ] $^+$ ; Anal. Calcd. for  $\text{C}_{28}\text{H}_{19}\text{Cl}_2\text{NO}_3$ : C, 68.86; H, 3.92; N, 2.87; Found: C, 68.80; H, 3.90; N, 2.98; **Crystal data** for **3f**: empirical formula,  $\text{C}_{28}\text{H}_{19}\text{Cl}_2\text{NO}_3$ ; formula weight, 488.34; crystal color, habit: colorless, plate; crystal dimensions, 0.41 X 0.22 X 0.18  $\text{mm}^3$ ; crystal system, triclinic; lattice type, primitive; lattice parameters,  $a = 9.0278(7)$  Å,  $b = 10.5146(9)$  Å,  $c = 13.4184(11)$  Å;  $\alpha = 79.220(1)$ ;  $\beta = 75.225(1)$ ;  $\gamma = 72.025(1)$ ;  $V = 1163.34(16)$  Å $^3$ ; space group, *P*-1 (International Table No. 2);  $Z = 2$ ;  $D_{\text{calcd}} = 1.394$  g /  $\text{cm}^3$ ;  $F_{000} = 504$ ;

$\lambda(\text{Mo-K}\alpha) = 0.71073 \text{ \AA}$ ;  $R (I \geq 2\sigma_I) = 0.0412$ ;  $wR^2 = 0.1006$ . Detailed X-ray crystallographic data is available from the Cambridge Crystallographic Data Centre, 12 Union Road, Cambridge CB2 1EZ, UK (for compound **3f** CCDC # 656196).

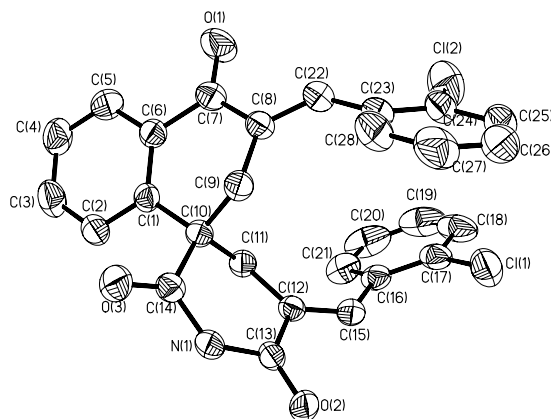

**Figure 3** ORTEP diagram (50% probability) of compound **3f** (Hydrogen atoms are omitted for clarity)

**2,5'-Di(*E*)-3-chlorobenzylidene]-[1,2,3,4-tetrahydronaphthalen-1-one]-4-spiro-3'-[piperidine-2',6'-dione] (**3g**):**

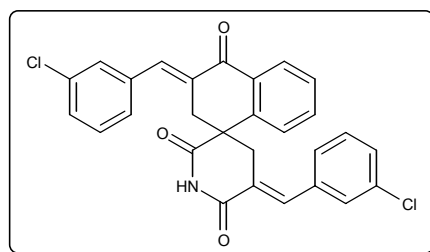

Yield: 67%; mp: 229-231 °C; IR (KBr):  $\nu$  3300-2950 (multiple bands), 1714, 1697, 1666, 1628  $\text{cm}^{-1}$ ;  $^1\text{H}$  NMR (400 MHz, 66.6% DMSO- $d_6$  in  $\text{CDCl}_3$ ):  $\delta$  3.08 & 3.42 (ABq, 2H,  $J = 15.4$  Hz), 3.17-3.29 (m, 2H),\* 7.00-7.70 (m, 13H), 8.06 (d, 1H,  $J = 7.6$  Hz), 11.36 (s, 1H);  $^{13}\text{C}$  NMR (100 MHz, 66.6% DMSO- $d_6$  in  $\text{CDCl}_3$ ):  $\delta$  32.98, 33.39, 45.08, 124.72, 125.69, 125.81, 126.28, 126.34, 126.48, 126.93, 127.01, 127.09, 127.47, 128.40, 128.42, 130.32, 130.75, 131.69, 131.72, 131.92, 134.14, 134.28, 134.75, 135.85, 140.89, 164.01, 172.16, 183.15; LCMS ( $m/z$ ): 486 (M-H) $^-$ , 488 [(M+2)-H] $^-$ , 490 [(M+4)-H] $^-$ ; Anal. Calcd. for  $\text{C}_{28}\text{H}_{19}\text{Cl}_2\text{NO}_3$ : C, 68.86; H, 3.92; N, 2.87; Found: C, 68.73; H, 3.93; N, 2.83; \*[One of the methylenes

(two protons) appears as multiplet at  $\delta$  3.17-3.29 which partly merges with moisture peak in DMSO- $d_6$  at  $\delta$  3.32].

**2,5'-Di(*E*)-4-chlorobenzylidene]-[1,2,3,4-tetrahydronaphthalen-1-one]-4-spiro-3'-[piperidine-2',6'-dione] (3h):**

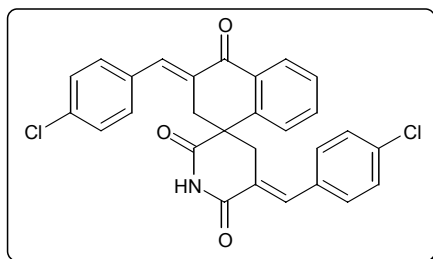

Yield: 77%; mp: 236-238 °C; IR (KBr):  $\nu$  3300-3000 (multiple bands), 1712, 1685, 1652, 1626  $\text{cm}^{-1}$ ;  $^1\text{H}$  NMR (400 MHz,  $\text{CDCl}_3$ ):  $\delta$  3.04 (s, 2H), 3.33 & 3.47 (ABq, 2H,  $J = 14.8$  Hz), 6.82 (d, 2H,  $J = 7.3$  Hz), 7.08-7.40 (m, 7H), 7.41-7.54 (m, 1H), 7.55-7.63 (m, 1H), 7.66 (s, 1H), 7.80 (s, 1H), 8.21 (d, 1H,  $J = 7.2$  Hz), 8.35 (s, 1H);  $^{13}\text{C}$  NMR (100 MHz, 50% DMSO- $d_6$  in  $\text{CDCl}_3$ ):  $\delta$  34.00, 34.45, 46.35, 124.84, 125.57, 127.20, 127.27, 127.54, 129.55, 129.76, 129.98, 131.23, 131.31, 131.90, 132.60, 133.36, 133.50, 136.25, 137.64, 141.61, 165.06, 173.21, 184.11; LCMS ( $m/z$ ): 488 ( $\text{M}+\text{H}$ ) $^+$ , 490 [ $(\text{M}+2)+\text{H}$ ] $^+$ , 492 [ $(\text{M}+4)+\text{H}$ ] $^+$ ; Anal. Calcd. for  $\text{C}_{28}\text{H}_{19}\text{Cl}_2\text{NO}_3$ : C, 68.86; H, 3.92; N, 2.87; Found: C, 68.66; H, 3.95; N, 2.86.

**2,5'-Di(*E*)-4-bromobenzylidene]-[1,2,3,4-tetrahydronaphthalen-1-one]-4-spiro-3'-[piperidine-2',6'-dione] (3i):**

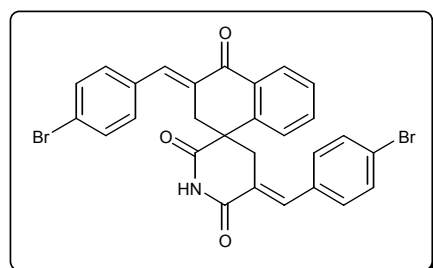

Yield: 71%; mp: 233-235 °C; IR (KBr):  $\nu$  3300-3050 (multiple bands), 1707, 1684, 1650, 1620  $\text{cm}^{-1}$ ;  $^1\text{H}$  NMR (400 MHz,  $\text{CDCl}_3$ ):  $\delta$  3.03 (s, 2H), 3.33 & 3.46 (ABq, 2H,  $J = 15.0$  Hz), 6.74 (d, 2H,  $J = 8.4$  Hz), 7.05 (d, 2H,  $J = 8.4$  Hz), 7.24-7.54 (m, 6H), 7.56-7.73 (m, 1H), 7.64 (s, 1H), 7.78 (s, 1H), 8.22 (d, 1H,  $J =$

7.8 Hz), 8.28 (s, 1H);  $^{13}\text{C}$  NMR (100 MHz, 50% DMSO- $d_6$  in  $\text{CDCl}_3$ ):  $\delta$  33.98, 34.41, 46.32, 121.78, 121.92, 124.91, 125.56, 127.19, 127.24, 129.75, 129.84, 130.18, 130.46, 131.29, 131.63, 132.30, 132.59, 136.24, 137.63, 141.60, 165.03, 173.18, 184.10; LCMS ( $m/z$ ): 574 (M-H) $^-$ , 576 [(M+2)-H] $^-$ , 578 [(M+4)-H] $^-$ ; Anal. Calcd. for  $\text{C}_{28}\text{H}_{19}\text{Br}_2\text{NO}_3$ : C, 58.26; H, 3.32; N, 2.43; Found: C, 58.38; H, 3.33; N, 2.44.

### 3,3'-Spiro-bis[5- $\{(E)\text{-benzylidene}\}$ piperidine-2,6-dione] (**4a**):

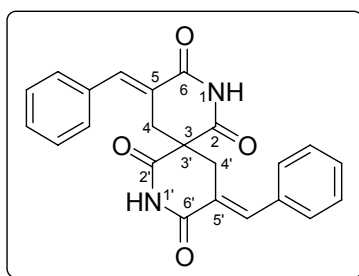

To a stirred solution of *tert*-butyl 3-acetoxy-2-methylene-3-phenylpropanoate (**1a**) (2 mmol, 0.552 g) in acetonitrile (3 mL) were added malononitrile (1 mmol, 0.066 g, 0.06 mL) and triethyl amine (1 mmol, 0.131 mL). After stirring at room temperature for 1 h, solvent acetonitrile and  $\text{Et}_3\text{N}$  were evaporated under the reduced pressure. The resulting residue was diluted with dichloromethane (5 mL) and cooled to 0 °C. To this solution at 0 °C conc.  $\text{H}_2\text{SO}_4$  (2 mmol, 0.192 g, 0.10 mL) and trifluoroacetic anhydride (TFAA, 2 mmol, 0.42 g, 0.28 mL) were added. Then the reaction mixture was allowed to warm to room temperature. After stirring for 24 h at room temperature the reaction mixture was poured into aqueous  $\text{K}_2\text{CO}_3$  solution. The solid separated was filtered and well washed with water followed by ethyl acetate. Thus the obtained solid was dried under *vacuo*, to provide pure 3,3'-spiro-bis[5- $\{(E)\text{-benzylidene}\}$ piperidine-2,6-dione] (**4a**), as a colorless solid in 75% (0.289 g) yield; mp: 255 °C (dec.); IR (KBr):  $\nu$  3200-2830 (multiple bands), 1711, 1680, 1610  $\text{cm}^{-1}$ ;  $^1\text{H}$  NMR (400 MHz, 50% DMSO- $d_6$  in  $\text{CDCl}_3$ ):  $\delta$  2.86 & 3.34 (ABq, 4H,  $J = 15.2$  Hz), 7.19-7.41 (m, 10H), 7.72 (s, 2H), 11.08 (br s, 2H);  $^{13}\text{C}$  NMR (100 MHz, DMSO- $d_6$ ):  $\delta$  31.02, 50.84 125.59, 128.88, 129.34, 129.87, 134.34, 138.90, 165.97, 170.54; LCMS ( $m/z$ ): 387 (M+H) $^+$ ; Anal. Calcd. for  $\text{C}_{23}\text{H}_{18}\text{N}_2\text{O}_4$ : C, 71.49; H, 4.70; N, 7.25; Found: C, 71.33; H, 4.71; N, 7.17.

Similar procedure was followed for the compound **4c** as the solid separates out after the reaction mixture was poured into aqueous  $K_2CO_3$  solution. In the case of other compounds **4b**, **4d** & **4e**, after pouring into aqueous  $K_2CO_3$  solution, the compound was extracted with ethyl acetate (3 X 50 mL). The combined organic layer was dried over anhydrous  $Na_2SO_4$ . Solvent was evaporated and the crude, thus obtained was purified by column chromatography, using 100% ethyl acetate to furnish pure product (**4b** or **4d** or **4e**) as a colorless solid.

**3,3'-Spiro-bis[5-{(E)-2-methylbenzylidene}piperidine-2,6-dione] (4b):**

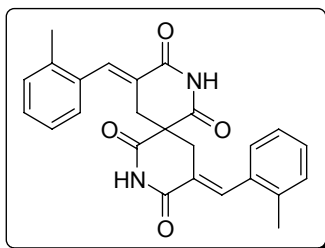

Yield: 56%; mp: 190-192 °C; IR (KBr):  $\nu$  3200-2830 (multiple bands), 1711, 1680, 1622  $cm^{-1}$ ;  $^1H$  NMR (400 MHz,  $DMSO-d_6$ ):  $\delta$  2.15 (s, 6H), 2.80 & 3.10 (ABq, 4H,  $J = 15.4$  Hz), 6.92-7.41 (m, 8H), 7.69 (s, 2H), 11.29 (br s, 2H)\*;  $^{13}C$  NMR (100 MHz,  $DMSO-d_6$ ):  $\delta$  19.58, 30.95, 51.05, 125.89, 126.38, 128.61, 129.16, 130.38, 133.66, 137.21, 138.26, 166.16, 170.94; LCMS ( $m/z$ ): 415 ( $M+H$ )<sup>+</sup>; Anal. Calcd. for  $C_{25}H_{22}N_2O_4$ : C, 72.45; H, 5.35; N, 6.76; Found: C, 72.23; H, 5.34; N, 6.74; \*[For observation of -NH-proton we recorded the  $^1H$  NMR spectrum with more sample].

**3,3'-Spiro-bis[5-{(E)-4-methylbenzylidene}piperidine-2,6-dione] (4c):**

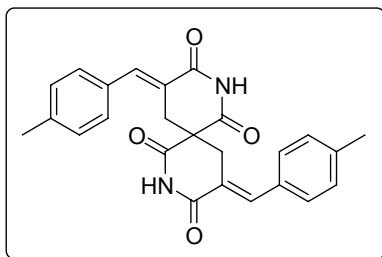

Yield: 64%; mp: 245 °C (dec.); IR (KBr):  $\nu$  3200-2800 (multiple bands), 1711, 1684, 1618  $cm^{-1}$ ;  $^1H$  NMR (400 MHz,  $DMSO-d_6$ ):  $\delta$  2.33 (s, 6H), 3.08 & 3.32\* (ABq, 4H,  $J = 15.8$  Hz), 7.19-7.41 (m, 8H), 7.68 (s,

2H), 11.20 (br s, 2H);  $^{13}\text{C}$  NMR (100 MHz, DMSO- $d_6$ ):  $\delta$  21.13, 31.12, 50.82, 124.60, 129.53, 130.01, 131.51, 139.11, 139.34, 166.08, 170.59; LCMS ( $m/z$ ): 415 (M+H) $^+$ ; Anal. Calcd. for  $\text{C}_{25}\text{H}_{22}\text{N}_2\text{O}_4$ : C, 72.45; H, 5.35; N, 6.76; Found: C, 72.63; H, 5.37; N, 6.84; \*[One of the doublet of AB quartet for  $\text{CH}_2$  protons (four protons) is merged with moisture in DMSO- $d_6$ . To prove this, our attempts using  $\text{Eu}(\text{fod})_3$  as a shift reagent, were unsuccessful. However, when we recorded in pyridine- $d_5$  as a deuterated solvent clear appearance of AB quartet at  $\delta$  3.32 & 3.97 (4H,  $J=15.6$  Hz) was observed].

**3,3'-Spiro-bis[5- $\{(E)$ -4-ethylbenzylidene}piperidine-2,6-dione] (4d):**

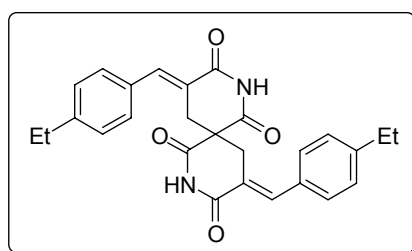

Yield: 59%; mp: 218-220  $^{\circ}\text{C}$ ; IR (KBr):  $\nu$  3200-2850 (multiple bands), 1724, 1699 1630  $\text{cm}^{-1}$ ;  $^1\text{H}$  NMR (400 MHz,  $\text{CDCl}_3$ ):  $\delta$  1.27 (t, 6H,  $J = 7.6$  Hz), 2.70 (q, 4H,  $J = 7.6$  Hz), 2.94 & 3.53 (ABq, 4H,  $J = 15.6$  Hz), 7.17-7.30 (m, 8H), 7.93 (s, 2H), 8.23 (s, 2H,  $\text{D}_2\text{O}$  exchangeable);  $^{13}\text{C}$  NMR (100 MHz, DMSO- $d_6$ ):  $\delta$  15.46, 28.20, 31.18, 50.85, 124.65, 128.36, 130.14, 131.80, 139.08, 145.52, 166.12, 170.61; LCMS ( $m/z$ ): 443 (M+H) $^+$ ; Anal. Calcd. for  $\text{C}_{27}\text{H}_{26}\text{N}_2\text{O}_4$ : C, 73.28; H, 5.92; N, 6.33; Found: C, 73.07; H, 5.92; N, 6.23; **Crystal data** for **4d**: empirical formula,  $\text{C}_{27}\text{H}_{26}\text{N}_2\text{O}_4$ ; formula weight, 442.50; crystal color, habit: colorless, rectangular; crystal dimensions, 0.40 X 0.32 X 0.26  $\text{mm}^3$ ; crystal system, triclinic; lattice type, primitive; lattice parameters,  $a = 10.0689(7)$   $\text{\AA}$ ,  $b = 10.7855(8)$   $\text{\AA}$ ,  $c = 12.4469(9)$   $\text{\AA}$ ;  $\alpha = 101.142(1)$ ;  $\beta = 108.914(1)$ ;  $\gamma = 105.628(1)$ ;  $V = 1171.60(15)$   $\text{\AA}^3$ ; space group,  $P-1$  (International Table No. 2);  $Z = 2$ ;  $D_{\text{calcd}} = 1.254$   $\text{g / cm}^3$ ;  $F_{000} = 468$ ;  $\lambda(\text{Mo K}\alpha) = 0.71073$   $\text{\AA}$ ;  $R(I \geq 2\sigma_1) = 0.0617$ ;  $wR^2 = 0.1824$ . Detailed X-ray crystallographic data is available from the Cambridge Crystallographic Data Centre, 12 Union Road, Cambridge CB2 1EZ, UK (for compound **4d** CCDC # 656197).



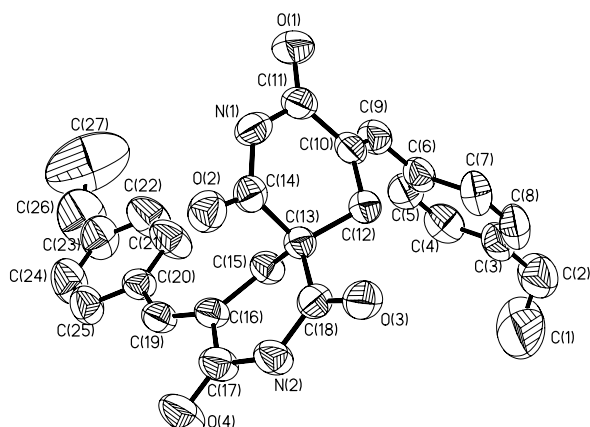

**Figure 4** ORTEP diagram (50% probability) of compound **4d**  
(Hydrogen atoms are omitted for clarity)

**3,3'-Spiro-bis[5-*(E)*-2-chlorobenzylidene}piperidine-2,6-dione] (**4e**):**

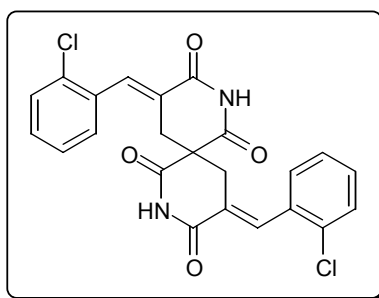

Yield: 55%; mp: 240-241 °C; IR (KBr):  $\nu$  3200-2800 (multiple bands), 1716, 1687, 1639  $\text{cm}^{-1}$ ;  $^1\text{H}$  NMR (400 MHz,  $\text{DMSO-}d_6$ ):  $\delta$  2.90 & 3.17 (ABq, 4H,  $J = 15.6$  Hz), 7.34 (d, 2H,  $J = 7.6$  Hz), 7.38-7.48 (m, 4H), 7.56 (d, 2H,  $J = 7.6$  Hz), 7.68 (s, 2H), 11.42 (s, 2H);  $^{13}\text{C}$  NMR (100 MHz,  $\text{DMSO-}d_6$ ):  $\delta$  30.87, 50.84, 127.42, 127.90, 129.88, 130.58, 130.99, 132.64, 133.55, 135.51, 165.60, 170.42; LCMS ( $m/z$ ): 455 ( $\text{M}+\text{H}$ ) $^+$ ; 457 [ $(\text{M}+2)+\text{H}$ ] $^+$ ; 459 [ $(\text{M}+4)+\text{H}$ ] $^+$ ; Anal. Calcd. for  $\text{C}_{22}\text{H}_{16}\text{Cl}_2\text{N}_2\text{O}_4$ : C, 60.67; H, 3.54; N, 6.15; Found: C, 60.55; H, 3.51; N, 6.11.
